# Supplementary Tables

Kieran Campbell                      Christopher Yau  
University of Oxford              University of Birmingham

October 5, 2017

|      | 1  | 2  | 3  | 4  | 5  | 6  | 7  |
|------|----|----|----|----|----|----|----|
| aNSC | 3  | 0  | 21 | 55 | 15 | 46 | 12 |
| NPC  | 2  | 0  | 2  | 2  | 1  | 11 | 13 |
| qNSC | 22 | 33 | 10 | 0  | 1  | 1  | 2  |

Table 1: Comparison of experimentally measured cell types (rows) and Ouija-inferred cell types (columns) for the Dulken et al. dataset.

|     | 1  | 2  | 3  | 4  | 5  | 6  | 7  | 8  |
|-----|----|----|----|----|----|----|----|----|
| 00h | 81 | 11 | 0  | 0  | 0  | 0  | 0  | 0  |
| 12h | 0  | 42 | 60 | 0  | 0  | 0  | 0  | 0  |
| 24h | 0  | 0  | 65 | 0  | 1  | 0  | 0  | 0  |
| 36h | 0  | 0  | 17 | 47 | 70 | 25 | 10 | 3  |
| 72h | 0  | 0  | 0  | 0  | 33 | 42 | 18 | 45 |
| 96h | 0  | 0  | 0  | 0  | 45 | 38 | 36 | 69 |

Table 2: Comparison of cell capture times (rows) and Ouija-inferred cell types (columns) for the Chu et al. dataset.

| Number of genes | Simulation regime     | $p$ -value |
|-----------------|-----------------------|------------|
| 6               | Sigmoidal             | 2.6E-03    |
| 6               | Complementary log-log | 1.3E-05    |
| 6               | Probit                | 1.3E-04    |
| 6               | Threshold             | 5.9E-28    |
| 9               | Sigmoidal             | 1.8E-04    |
| 9               | Complementary log-log | 6.7E-07    |
| 9               | Probit                | 3.3E-09    |
| 9               | Threshold             | 3.3E-12    |
| 12              | Sigmoidal             | 2.0E-03    |
| 12              | Complementary log-log | 1.8E-06    |
| 12              | Probit                | 2.5E-08    |
| 12              | Threshold             | 9.2E-06    |
| 15              | Sigmoidal             | 3.0E-03    |
| 15              | Complementary log-log | 4.2E-06    |
| 15              | Probit                | 2.0E-09    |
| 15              | Threshold             | 6.7E-03    |

Table 3: P-values reported by Wilcoxon rank-sum test on the correlations to true pseudotime comparing informative priors to noninformative priors.
